# Supplementary material for: Peptidoglycan Recognition Proteins Kill Bacteria by Inducing Oxidative, Thiol, and Metal Stress
Source: PubMed Central journal article supplement (PMC4102600; doi:10.1371/journal.ppat.1004280), 2014-07-17
Supplement: ppat.1004280.s009.pdf [file ppat.1004280.s009.pdf]

Table S2. Top *B. subtilis* genes up-regulated by PGRP, gentamicin, and CCCP<sup>a</sup>.

| Genes (regulators)                                   | Function                                                                                            | Gene array |       |      |                                         |               |                           | qRT PCR       |        |        |       |                                         |               |
|------------------------------------------------------|-----------------------------------------------------------------------------------------------------|------------|-------|------|-----------------------------------------|---------------|---------------------------|---------------|--------|--------|-------|-----------------------------------------|---------------|
|                                                      |                                                                                                     | PGRP       | Gent  | CCCP | <i>P</i> ( <i>t</i> -test) <sup>b</sup> |               | FDR <i>q</i> <sup>c</sup> |               | PGRP   | Gent   | CCCP  | <i>P</i> ( <i>t</i> -test) <sup>b</sup> |               |
| <b>Oxidative stress</b>                              |                                                                                                     |            |       |      |                                         |               |                           |               |        |        |       |                                         |               |
| <i>yrkl</i>                                          | Predicted NAD(P)H oxidoreductase                                                                    | 60±30      | 1±0   | 1±0  | 0.0625                                  | 0.0625        | 0.0824                    | 0.0815        |        |        |       |                                         |               |
| <i>kata</i> (PerR)                                   | Vegetative catalase 1, degrades H <sub>2</sub> O <sub>2</sub>                                       | 54±24      | 94±26 | 13±3 | 0.1623                                  | 0.0822        | 0.1238                    | 0.0908        | 417±45 | 469±97 | 48±6  | 0.3239                                  | <b>0.0001</b> |
| <i>nfrA</i> (Spx, σ <sup>A</sup> , σ <sup>D</sup> )  | NADPH nitro/flavin reductase, response to thiol stress and oxidative stress                         | 28±1       | 5±2   | 4±0  | <b>0.0003</b>                           | <b>0.0000</b> | <b>0.0093</b>             | <b>0.0039</b> | 14±3   | 3±1    | 2±0.5 | <b>0.0066</b>                           | <b>0.0040</b> |
| <i>ybcF</i>                                          | Carbonic anhydrase-like protein, maintains pH                                                       | 17±8       | 2±0   | 1±0  | 0.0642                                  | 0.0586        | 0.0834                    | 0.0804        | 191±49 | 17±4   | 8±0.4 | <b>0.0061</b>                           | <b>0.0048</b> |
| <i>ybcD</i>                                          | Putative aldehyde dehydrogenase, aldehyde oxidation                                                 | 17±7       | 3±1   | 1±0  | <b>0.0472</b>                           | <b>0.0346</b> | 0.0743                    | 0.0655        | 26±5   | 4±0.5  | 1±0.2 | <b>0.0031</b>                           | <b>0.0017</b> |
| <i>mrgA</i> (PerR, σ <sup>A</sup> )                  | Mini-ferritin, protects from oxidative stress                                                       | 17±6       | 68±21 | 22±5 | <b>0.0416</b>                           | 0.2574        | 0.0701                    | 0.1537        |        |        |       |                                         |               |
| <i>ndhF</i>                                          | NADH dehydrogenase, respiration                                                                     | 16±6       | 8±6   | 1±0  | 0.1996                                  | <b>0.0348</b> | 0.1369                    | 0.0655        |        |        |       |                                         |               |
| <i>katE</i> (σ <sup>B</sup> )                        | Catalase 2, degrades H <sub>2</sub> O <sub>2</sub>                                                  | 14±4       | 5±2   | 5±2  | 0.0620                                  | <b>0.0511</b> | 0.0823                    | 0.0765        | 22±6   | 3±1    | 2±0.2 | <b>0.0084</b>                           | <b>0.0060</b> |
| <i>ohrB</i> (σ <sup>B</sup> )                        | Organic hydroperoxide reductase                                                                     | 13±3       | 3±1   | 4±1  | <b>0.0244</b>                           | <b>0.0352</b> | 0.0567                    | 0.0656        |        |        |       |                                         |               |
| <i>srfAB</i> (PerR, ComAP)                           | Surfactin synthetase, thiol stress response                                                         | 12±9       | 1±0   | 15±7 | 0.1396                                  | 0.4004        | 0.1149                    | 0.1980        |        |        |       |                                         |               |
| <i>ywcH</i> (σ <sup>D</sup> , σ <sup>A</sup> )       | Putative monooxygenase, detoxification                                                              | 12±0       | 3±1   | 4±1  | <b>0.0001</b>                           | <b>0.0001</b> | <b>0.0073</b>             | <b>0.0065</b> | 20±4   | 2±0.4  | 2±0.3 | <b>0.0015</b>                           | <b>0.0014</b> |
| <i>ycbP</i> (σ <sup>B</sup> )                        | Putative NAD(P)H-dependent FMN reductase                                                            | 12±3       | 2±1   | 2±0  | <b>0.0181</b>                           | <b>0.0144</b> | <b>0.0497</b>             | <b>0.0477</b> |        |        |       |                                         |               |
| <i>ahpF</i> (PerR, σ <sup>A</sup> )                  | Alkyl hydroperoxide reductase, degrades H <sub>2</sub> O <sub>2</sub>                               | 11±4       | 9±2   | 2±0  | 0.3578                                  | 0.0560        | 0.1982                    | 0.0793        | 36±10  | 14±4   | 2±0.5 | <b>0.0484</b>                           | <b>0.0087</b> |
| <i>yxnA</i> (σ <sup>B</sup> )                        | Oxidoreductase, induced in oxidative stress                                                         | 10±2       | 2±0   | 3±1  | <b>0.0073</b>                           | <b>0.0157</b> | <b>0.0326</b>             | <b>0.0495</b> | 13±4   | 2±0.5  | 2±0.6 | <b>0.0092</b>                           | <b>0.0109</b> |
| <i>yqjM</i> (σ <sup>A</sup> )                        | Flavin oxidoreductase, reduction of aldehydes and ketones, induced by H <sub>2</sub> O <sub>2</sub> | 10±3       | 1±0   | 1±0  | <b>0.0160</b>                           | <b>0.0166</b> | <b>0.0464</b>             | <b>0.0503</b> | 18±2   | 1±0.2  | 1±0.4 | <b>0.0000</b>                           | <b>0.0000</b> |
| <i>yfkI</i> (σ <sup>B</sup> )                        | Stress protein, protects from H <sub>2</sub> O <sub>2</sub>                                         | 10±6       | 5±1   | 3±1  | 0.2176                                  | 0.1478        | 0.1439                    | 0.1173        |        |        |       |                                         |               |
| <b>Copper and zinc efflux and detoxification</b>     |                                                                                                     |            |       |      |                                         |               |                           |               |        |        |       |                                         |               |
| <i>copA</i> (CsoR, σ <sup>A</sup> )                  | Cu efflux transporting ATPase                                                                       | 53±11      | 69±5  | 1±0  | 0.1193                                  | <b>0.0045</b> | 0.1060                    | <b>0.0306</b> | 93±20  | 136±15 | 3±0.4 | 0.0692                                  | <b>0.0021</b> |
| <i>cadA</i> (CzrA, σ <sup>A</sup> )                  | Cd, Zn, Cu, Co, Ni efflux ATPase                                                                    | 52±12      | 77±7  | 1±0  | 0.0796                                  | <b>0.0061</b> | 0.0907                    | <b>0.0336</b> | 33±9   | 49±9   | 1±0.1 | 0.1711                                  | <b>0.0187</b> |
| <i>czcD</i> (CzrA, σ <sup>A</sup> )                  | K/H- Zn, Cu, Co, Ni efflux antiporter                                                               | 52±17      | 49±11 | 5±2  | 0.4329                                  | <b>0.0268</b> | 0.2231                    | 0.0594        | 34±4   | 21±6   | 3±0.8 | 0.0581                                  | <b>0.0002</b> |
| <i>copZ</i> (CsoR, σ <sup>A</sup> )                  | Cu chaperone for Cu efflux                                                                          | 21±3       | 30±2  | 9±3  | <b>0.0288</b>                           | <b>0.0218</b> | 0.0611                    | <b>0.0548</b> |        |        |       |                                         |               |
| <i>trkA</i> (CzrA, σ <sup>A</sup> )                  | Cation exporter, resistance to metal ions                                                           | 12±1       | 8±2   | 1±0  | 0.0939                                  | <b>0.0001</b> | 0.0962                    | <b>0.0056</b> |        |        |       |                                         |               |
| <b>Arsenite efflux and detoxification</b>            |                                                                                                     |            |       |      |                                         |               |                           |               |        |        |       |                                         |               |
| <i>arsB</i> (ArsR, σ <sup>F</sup> , σ <sup>A</sup> ) | Arsenite efflux pump                                                                                | 151±64     | 96±33 | 1±0  | 0.2448                                  | <b>0.0398</b> | 0.1548                    | 0.0685        | 238±33 | 73±20  | 2±0.6 | <b>0.0025</b>                           | <b>0.0002</b> |
| <i>yqkC</i> (ArsR, σ <sup>F</sup> , σ <sup>A</sup> ) | Arsenite efflux pump operon                                                                         | 101±40     | 71±25 | 2±0  | 0.2782                                  | <b>0.0326</b> | 0.1686                    | 0.0635        |        |        |       |                                         |               |
| <i>arsC</i> (ArsR, σ <sup>F</sup> , σ <sup>A</sup> ) | Arsenate reductase, reduces arsenate to arsenite                                                    | 90±39      | 70±23 | 1±0  | 0.3422                                  | <b>0.0435</b> | 0.1927                    | 0.0712        | 220±49 | 167±34 | 2±0.2 | 0.2087                                  | <b>0.0023</b> |
| <b>Other transporters</b>                            |                                                                                                     |            |       |      |                                         |               |                           |               |        |        |       |                                         |               |
| <i>ybcL</i>                                          | MFS-type transporter, unknown function                                                              | 56±36      | 4±0   | 1±0  | 0.1129                                  | 0.1037        | 0.1036                    | 0.0995        |        |        |       |                                         |               |
| <i>ytrF</i> (YtrA, σ <sup>A</sup> )                  | ABC transporter, unknown function                                                                   | 37±4       | 2±0   | 2±0  | <b>0.0004</b>                           | <b>0.0004</b> | <b>0.0102</b>             | <b>0.0131</b> | 45±10  | 2±0.8  | 2±0.5 | <b>0.0030</b>                           | <b>0.0031</b> |
| <i>ytrC</i> (YtrA, σ <sup>A</sup> )                  | ABC transporter, unknown function                                                                   | 32±11      | 1±0   | 2±1  | <b>0.0220</b>                           | <b>0.0259</b> | <b>0.0544</b>             | 0.0585        | 62±17  | 3±0.8  | 2±0.4 | <b>0.0072</b>                           | <b>0.0071</b> |
| <i>ytrB</i> (YtrA, σ <sup>A</sup> )                  | ABC transporter, unknown function                                                                   | 25±10      | 1±0   | 2±0  | <b>0.0328</b>                           | <b>0.0370</b> | 0.0642                    | 0.0671        | 37±9   | 1±0.2  | 2±0.5 | <b>0.0045</b>                           | <b>0.0055</b> |
| <i>lctP</i> (Rex, σ <sup>A</sup> )                   | L-lactate permease                                                                                  | 23±9       | 7±4   | 27±8 | 0.0970                                  | 0.3606        | 0.0977                    | 0.1858        |        |        |       |                                         |               |
| <i>ytrD</i> (YtrA, σ <sup>A</sup> )                  | ABC transporter, unknown function                                                                   | 21±7       | 1±0   | 2±0  | <b>0.0212</b>                           | <b>0.0231</b> | <b>0.0532</b>             | 0.0559        | 13±1   | 1±0.2  | 2±0.3 | <b>0.0001</b>                           | <b>0.0001</b> |
| <i>khtT</i>                                          | K/H K <sup>+</sup> efflux antiporter, acid stress response                                          | 20±2       | 1±0   | 1±0  | <b>0.0006</b>                           | <b>0.0006</b> | <b>0.0119</b>             | <b>0.0153</b> |        |        |       |                                         |               |
| <i>ytrE</i> (YtrA, σ <sup>A</sup> )                  | ABC transporter, unknown function                                                                   | 19±8       | 1±0   | 1±0  | <b>0.0428</b>                           | <b>0.0459</b> | 0.0711                    | 0.0727        | 19±4   | 1±0.3  | 2±0.3 | <b>0.0013</b>                           | <b>0.0016</b> |
| <i>yvdR</i>                                          | Multidrug efflux transporter homolog                                                                | 13±6       | 18±6  | 14±5 | 0.3144                                  | 0.4856        | 0.1826                    | 0.2219        |        |        |       |                                         |               |
| <i>yvdS</i>                                          | Multidrug efflux transporter homolog                                                                | 11±5       | 18±7  | 12±6 | 0.2326                                  | 0.4628        | 0.1497                    | 0.2156        |        |        |       |                                         |               |
| <i>zosA</i> (PerR, σ <sup>A</sup> )                  | Zn uptake ATPase, oxidative/thiol stress                                                            | 11±5       | 24±6  | 7±5  | 0.0821                                  | 0.2893        | 0.0920                    | 0.1634        |        |        |       |                                         |               |

Table S2. Continued

|                                                           |                                                            |       |        |       |               |               |               |               |        |       |       |               |               |  |
|-----------------------------------------------------------|------------------------------------------------------------|-------|--------|-------|---------------|---------------|---------------|---------------|--------|-------|-------|---------------|---------------|--|
| <i>nrgA</i> (TnrA, $\sigma^A$ )                           | Ammonium uptake, acid stress response                      | 11±2  | 36±13  | 41±23 | 0.0746        | 0.1356        | 0.0881        | 0.1115        |        |       |       |               |               |  |
| <i>yhaU</i>                                               | K/H K <sup>+</sup> efflux antiporter, acid stress response | 11±1  | 1±0    | 1±0   | <b>0.0004</b> | <b>0.0004</b> | <b>0.0130</b> | <b>0.0131</b> |        |       |       |               |               |  |
| <b>Chaperones, protein quality control, thiol stress</b>  |                                                            |       |        |       |               |               |               |               |        |       |       |               |               |  |
| <i>nhaX</i> ( $\sigma^B$ )                                | Stress protein, protects from oxidative damage             | 26±2  | 6±2    | 3±1   | <b>0.0016</b> | <b>0.0004</b> | <b>0.0172</b> | <b>0.0131</b> | 15±1   | 2±0   | 2±1   | <b>0.0000</b> | <b>0.0001</b> |  |
| <i>clpC</i> (CtsR, $\sigma^B$ , $\sigma^F$ , $\sigma^A$ ) | Inducer of autolysins (LytC and LytD)                      | 17±4  | 10±2   | 2±1   | 0.1133        | 0.0092        | 0.1073        | <b>0.0393</b> |        |       |       |               |               |  |
| <i>yraA</i> (AdhR, $\sigma^B$ , $\sigma^M$ )              | Cysteine proteinase, degrades thiol-damaged proteins       | 15±3  | 2±1    | 4±0   | <b>0.0063</b> | <b>0.0087</b> | <b>0.0308</b> | <b>0.0388</b> | 23±3   | 2±0   | 1±0.3 | <b>0.0004</b> | <b>0.0003</b> |  |
| <i>htrB</i> (C <sub>ssRS</sub> )                          | HtrA-like serine protease                                  | 14±4  | 5±0    | 0±0   | <b>0.0390</b> | <b>0.0123</b> | 0.0686        | <b>0.0456</b> | 100±33 | 19±9  | 2±0.2 | <b>0.0269</b> | <b>0.0118</b> |  |
| <i>mcsB</i> (CtsR, $\sigma^B$ , $\sigma^F$ )              | Arginine kinase, protein degradation, thiol stress         | 14±4  | 14±3   | 3±1   | 0.4891        | <b>0.0198</b> | 0.2380        | <b>0.0534</b> |        |       |       |               |               |  |
| <i>ctsR</i> (CtsR, $\sigma^B$ )                           | Master regulator of protein quality control                | 14±6  | 13±6   | 5±2   | 0.4612        | 0.1210        | 0.2310        | 0.1061        |        |       |       |               |               |  |
| <i>ctc</i> ( $\sigma^B$ )                                 | 50S ribosomal protein, protein synthesis                   | 13±1  | 3±1    | 5±1   | <b>0.0032</b> | <b>0.0054</b> | <b>0.0225</b> | <b>0.0317</b> |        |       |       |               |               |  |
| <i>mcsA</i> (CtsR, $\sigma^B$ , $\sigma^F$ )              | Activator of protein degradation, thiol stress             | 13±5  | 14±6   | 5±1   | 0.4548        | 0.0735        | 0.2293        | 0.0860        |        |       |       |               |               |  |
| <i>clpE</i> (CtsR, $\sigma^A$ )                           | Protease chaperone, protein degradation                    | 12±3  | 113±25 | 1±0   | <b>0.0077</b> | <b>0.0130</b> | <b>0.0332</b> | <b>0.0465</b> |        |       |       |               |               |  |
| <i>queD</i> (preQ1)                                       | Protein synthesis (trRNA modification)                     | 12±4  | 23±3   | 6±1   | <b>0.0541</b> | 0.1389        | 0.0792        | 0.1129        |        |       |       |               |               |  |
| <i>queE</i> (preQ1)                                       | Protein synthesis (trRNA modification)                     | 12±5  | 25±5   | 5±1   | 0.0754        | 0.1312        | 0.0884        | 0.1096        |        |       |       |               |               |  |
| <i>yyaO</i>                                               | Carboxypeptidase homolog                                   | 11±3  | 3±1    | 3±0   | <b>0.0338</b> | <b>0.0282</b> | 0.0651        | 0.0597        |        |       |       |               |               |  |
| <i>yfkH</i> ( $\sigma^B$ )                                | Putative tRNA-processing ribonuclease                      | 11±6  | 2±0    | 2±1   | 0.1026        | 0.1095        | 0.0998        | 0.1018        |        |       |       |               |               |  |
| <i>yugP</i>                                               | Putative metal-dependent protease                          | 10±1  | 2±0    | 2±0   | <b>0.0002</b> | <b>0.0002</b> | <b>0.0083</b> | <b>0.0100</b> |        |       |       |               |               |  |
| <i>cysS</i> (T-box, $\sigma^A$ )                          | Cysteine-tRNA synthetase, protein synthesis                | 10±3  | 2±1    | 1±0   | <b>0.0312</b> | <b>0.0246</b> | 0.0630        | 0.0573        |        |       |       |               |               |  |
| <i>htrA</i> (C <sub>ssRS</sub> , $\sigma^A$ )             | Serine protease Do (heat shock protein)                    | 9±3   | 4±0    | 1±0   | 0.1023        | <b>0.0297</b> | 0.0997        | 0.0607        | 81±21  | 15±5  | 1±0.2 | <b>0.0103</b> | <b>0.0041</b> |  |
| <b>Histidine synthesis</b>                                |                                                            |       |        |       |               |               |               |               |        |       |       |               |               |  |
| <i>hisI</i>                                               | Histidine synthesis                                        | 44±22 | 1±0    | 1±0   | 0.0582        | 0.0571        | 0.0811        | 0.0797        | 71±22  | 1±0.7 | 0.2±0 | <b>0.0092</b> | <b>0.0086</b> |  |
| <i>hisF</i>                                               | Histidine synthesis                                        | 31±17 | 1±0    | 1±0   | 0.0736        | 0.0735        | 0.0878        | 0.0860        | 96±15  | 2±1   | 0.5±0 | <b>0.0004</b> | <b>0.0003</b> |  |
| <i>hisH</i>                                               | Histidine synthesis                                        | 26±15 | 1±0    | 1±0   | 0.0891        | 0.0887        | 0.0951        | 0.0936        | 108±21 | 1±0.4 | 0.1±0 | <b>0.0012</b> | <b>0.0011</b> |  |
| <i>hisB</i>                                               | Histidine synthesis                                        | 24±14 | 1±0    | 1±0   | 0.0902        | 0.0902        | 0.0951        | 0.0936        |        |       |       |               |               |  |
| <i>hisA</i>                                               | Histidine synthesis                                        | 24±14 | 1±0    | 1±0   | 0.0892        | 0.0894        | 0.0951        | 0.0936        |        |       |       |               |               |  |
| <i>hisD</i>                                               | Histidine synthesis                                        | 18±10 | 1±0    | 1±0   | 0.0885        | 0.0885        | 0.0948        | 0.0935        |        |       |       |               |               |  |
| <i>hisG</i>                                               | Histidine synthesis                                        | 16±10 | 1±0    | 1±0   | 0.0998        | 0.0998        | 0.0988        | 0.0976        |        |       |       |               |               |  |
| <b>Energy</b>                                             |                                                            |       |        |       |               |               |               |               |        |       |       |               |               |  |
| <i>yrhJ</i> (FatR, $\sigma^M$ , $\sigma^W$ , $\sigma^X$ ) | Predicted NADPH-cytochrome reductase, fatty acids          | 34±8  | 4±1    | 1±0   | <b>0.0087</b> | <b>0.0067</b> | <b>0.0339</b> | <b>0.0352</b> | 46±11  | 19±5  | 8±2   | <b>0.0326</b> | <b>0.0069</b> |  |
| <i>ldh</i> (Rex, $\sigma^A$ )                             | Lactate dehydrogenase, respiration, fermentation           | 34±20 | 4±3    | 46±18 | 0.1123        | 0.3446        | 0.1034        | 0.1809        | 33±11  | 6±2   | 94±20 | <b>0.0226</b> | <b>0.0172</b> |  |
| <i>ptsG</i> (GlcT, $\sigma^A$ )                           | Glucose transport and phosphorylation                      | 24±17 | 4±1    | 16±1  | 0.1492        | 0.3244        | 0.1183        | 0.1143        |        |       |       |               |               |  |
| <i>nasD</i> (ResD, TnrA, $\sigma^A$ )                     | Nitrite reductase (nitrite as nitrogen source)             | 17±8  | 6±2    | 6±0   | 0.1301        | 0.1241        | 0.1098        | 0.1073        |        |       |       |               |               |  |
| <i>ycdF</i> ( $\sigma^B$ )                                | Predicted glucose dehydrogenase, generates NADPH           | 11±2  | 5±1    | 8±4   | <b>0.0326</b> | 0.2646        | 0.0640        | 0.1557        |        |       |       |               |               |  |
| <i>ycnD</i>                                               | NADPH-FMN oxidoreductase, electron transport               | 11±4  | 4±1    | 3±1   | 0.1117        | 0.0690        | 0.1034        | 0.0841        |        |       |       |               |               |  |
| <i>yqiG</i>                                               | Predicted flavin oxidoreductase, electron transport        | 10±3  | 1±0    | 2±1   | <b>0.0186</b> | <b>0.0301</b> | <b>0.0500</b> | 0.0609        |        |       |       |               |               |  |
| <i>pdhB</i> (stringent resp., $\sigma^A$ )                | Pyruvate dehydrogenase, TCA cycle                          | 9±5   | 4±1    | 18±2  | 0.1915        | 0.0967        | 0.1335        | 0.0957        |        |       |       |               |               |  |
| <i>gntR</i> (AbrB, $\sigma^A$ )                           | Repressor of gluconate operon                              | 9±3   | 2±0    | 2±1   | 0.0553        | 0.0579        | 0.0799        | 0.0803        |        |       |       |               |               |  |
| <b>Envelope lysis and</b>                                 |                                                            |       |        |       |               |               |               |               |        |       |       |               |               |  |

Table S2. Continued

|                                           |                                                                            |       |       |      |               |               |               |               |  |  |  |  |
|-------------------------------------------|----------------------------------------------------------------------------|-------|-------|------|---------------|---------------|---------------|---------------|--|--|--|--|
| <b>remodeling</b>                         |                                                                            |       |       |      |               |               |               |               |  |  |  |  |
| <i>ywbH</i>                               | Putative holin, regulates murein hydrolases                                | 46±15 | 7±1   | 3±0  | <b>0.0303</b> | <b>0.0226</b> | 0.0624        | 0.0555        |  |  |  |  |
| <i>yrkH</i>                               | Putative hydrolase                                                         | 34±17 | 1±0   | 1±0  | 0.0636        | 0.0636        | 0.0833        | 0.0820        |  |  |  |  |
| <i>ywbG</i>                               | Putative peptidoglycan hydrolase                                           | 23±8  | 2±0   | 2±1  | <b>0.0296</b> | <b>0.0292</b> | 0.0618        | 0.0604        |  |  |  |  |
| <i>ywoC</i> ( $\sigma^A$ )                | Putative hydrolase                                                         | 9±1   | 1±0   | 2±0  | <b>0.0002</b> | <b>0.0005</b> | <b>0.0091</b> | <b>0.0148</b> |  |  |  |  |
| <b>DNA repair</b>                         |                                                                            |       |       |      |               |               |               |               |  |  |  |  |
| <i>pyrAB</i> ( $\sigma^A$ )               | Carbamoyl-phosphate synthetase, pyrimidine synthesis                       | 51±26 | 46±7  | 6±3  | 0.3897        | <b>0.0214</b> | 0.2226        | 0.0915        |  |  |  |  |
| <i>pyrF</i> ( $\sigma^A$ )                | Orotidine-phosphate decarboxylase, pyrimidine synthesis                    | 40±20 | 45±2  | 5±2  | 0.4018        | 0.0740        | 0.2138        | 0.0860        |  |  |  |  |
| <i>pyrD</i> ( $\sigma^A$ )                | Dihydroorotic acid dehydrogenase, pyrimidine synthesis                     | 37±20 | 38±1  | 6±3  | 0.4766        | 0.1022        | 0.2346        | 0.0989        |  |  |  |  |
| <i>pyrC</i> ( $\sigma^A$ )                | Dihydroorotase, pyrimidine synthesis                                       | 34±24 | 59±21 | 20±3 | 0.2363        | 0.2892        | 0.1513        | 0.1634        |  |  |  |  |
| <i>pyrAA</i> ( $\sigma^A$ )               | Carbamoyl-phosphate synthetase, pyrimidine synthesis                       | 31±17 | 84±27 | 14±2 | 0.0850        | 0.1924        | 0.0933        | 0.1249        |  |  |  |  |
| <i>pyrE</i> ( $\sigma^A$ )                | Orotate phosphoribosyltransferase, pyrimidine synthesis                    | 29±7  | 63±4  | 4±1  | <b>0.0065</b> | <b>0.0136</b> | <b>0.0309</b> | <b>0.0470</b> |  |  |  |  |
| <i>pyrK</i> ( $\sigma^A$ )                | Dihydroorotic acid dehydrogenase, pyrimidine synthesis                     | 26±13 | 45±1  | 6±3  | 0.1055        | 0.0961        | 0.1010        | 0.0956        |  |  |  |  |
| <i>pyrB</i> ( $\sigma^A$ )                | Aspartate carbamoyltransferase, pyrimidine synthesis                       | 25±18 | 77±22 | 35±4 | 0.0680        | 0.3058        | 0.0856        | 0.1693        |  |  |  |  |
| <i>purC</i> ( $\sigma^A$ )                | phosphoribosylaminoimidazole succinocarboxamide synthase, purine synthesis | 11±3  | 36±12 | 4±1  | 0.0599        | 0.0592        | 0.0813        | 0.0806        |  |  |  |  |
| <i>purB</i> ( $\sigma^A$ )                | adenylsuccinate lyase, purine synthesis                                    | 10±2  | 27±6  | 7±2  | <b>0.0309</b> | 0.1761        | 0.0628        | 0.1262        |  |  |  |  |
| <b>Detoxification and stress-response</b> |                                                                            |       |       |      |               |               |               |               |  |  |  |  |
| <i>ywzA</i> ( $\sigma^B$ )                | General stress protein                                                     | 34±8  | 5±2   | 7±3  | <b>0.0118</b> | <b>0.0164</b> | <b>0.0394</b> | <b>0.0500</b> |  |  |  |  |
| <i>ywmE</i> ( $\sigma^B$ )                | Ethanol stress and general stress                                          | 24±6  | 4±1   | 4±1  | <b>0.0199</b> | <b>0.0205</b> | <b>0.0520</b> | <b>0.0538</b> |  |  |  |  |
| <i>bmrU</i> ( $\sigma^B$ )                | Multidrug resistance protein                                               | 23±7  | 5±2   | 6±2  | <b>0.0337</b> | <b>0.0422</b> | 0.0651        | 0.0703        |  |  |  |  |
| <i>ybyB</i> ( $\sigma^B$ )                | Survival of ethanol stress                                                 | 22±9  | 2±1   | 6±3  | <b>0.0452</b> | 0.0802        | 0.0729        | 0.0898        |  |  |  |  |
| <i>yfhK</i> ( $\sigma^B$ )                | General stress protein, ethanol stress                                     | 21±8  | 1±0   | 6±3  | <b>0.0335</b> | 0.0795        | 0.0651        | 0.0867        |  |  |  |  |
| <i>csbD</i> ( $\sigma^B$ )                | Survival of salt and temperature stress                                    | 12±5  | 2±1   | 7±3  | <b>0.0513</b> | 0.2261        | 0.0777        | 0.1412        |  |  |  |  |
| <i>ywsB</i> ( $\sigma^B$ )                | Survival of ethanol and salt stress                                        | 11±1  | 4±1   | 5±2  | <b>0.0027</b> | <b>0.0139</b> | <b>0.0215</b> | <b>0.0470</b> |  |  |  |  |
| <i>yxbG</i> ( $\sigma^B$ )                | General stress response                                                    | 11±3  | 3±1   | 4±1  | <b>0.0254</b> | <b>0.0336</b> | 0.0575        | 0.0645        |  |  |  |  |
| <i>yjIT</i> ( $\sigma^B$ )                | Ethanol and heat stress                                                    | 9±2   | 2±1   | 6±3  | <b>0.0165</b> | 0.1957        | <b>0.0496</b> | 0.1306        |  |  |  |  |

<sup>a</sup> Bacteria were treated with albumin (100 µg/ml, control), PGRP (PGLYRP4, 100 µg/ml), or gentamicin (5 µg/ml), for 30 min or CCCP (800 µM) for 15 min at 37°C, and gene expression was determined by whole genome expression arrays and qRT-PCR. Genes are listed from the most to the least up-regulated in each group. The numbers are mean ratios ± SEM of the gene expression signals in PGRP-, gentamicin-, or CCCP-treated bacteria to control albumin-treated bacteria, obtained from 3 independent whole genome expression arrays experiments and 3 independent qRT-PCR experiments (as indicated). All genes in PGRP-treated bacteria were expressed significantly higher than in control bacteria at  $P < 0.001$  by two sample one-tailed  $t$ -test (not shown), and 94% of these genes were expressed significantly higher than in control at FDR  $q \leq 0.05$  (not shown). The entire whole genome expression array data have been deposited in NCBI GEO under the accession number GSE44212.

<sup>b</sup>  $P$  values (two sample one-tailed  $t$ -test) for the differences in gene expression in PGRP-treated bacteria *versus* gentamicin- or CCCP-treated bacteria (numbers on the left or on the right, respectively) are shown as indicated, with  $P < 0.05$  in bold.

<sup>c</sup> FDR (false discovery rate)  $q$  values for the differences in gene expression in PGRP-treated bacteria *versus* gentamicin- or CCCP-treated bacteria (numbers on the left or on the right, respectively) are shown as indicated, with  $q \leq 0.05$  in bold.
